# Supplementary material
Source: PubMed Central journal article supplement (PMC5761075)
Supplement: NIHMS929247-supplement-supplement_1.pdf [file NIHMS929247-supplement-supplement_1.pdf]

## Supporting Information

# Structural Basis for Asymmetric Conductance of the Influenza M2 Proton Channel Investigated by Solid-State NMR Spectroscopy

Venkata S. Mandala, Shu Yu Liao, Byungsu Kwon and Mei Hong\*

Department of Chemistry, Massachusetts Institute of Technology, Cambridge, MA 02139

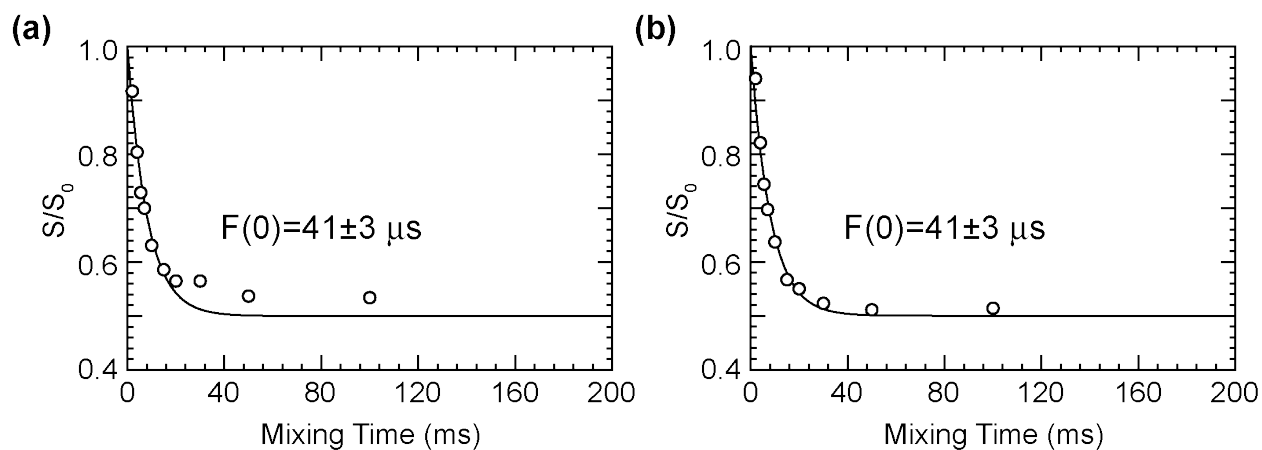

**Figure S1.**  $^{19}\text{F}$  CODEX data of the model compound 5- $^{19}\text{F}$ -Trp measured at 298 K on a 400 MHz spectrometer under (a) 10 kHz MAS. (b) 8 kHz MAS. Best-fit magnetization exchange curves used a  $^{19}\text{F}$ - $^{19}\text{F}$  nearest-neighbor distance of 4.62 Å. The best fit overlap integral,  $F(0)$ , equals 41  $\mu\text{s}$  for both datasets. The first z-filter time in the  $S_0$  experiments was 1 ms in these experiments.

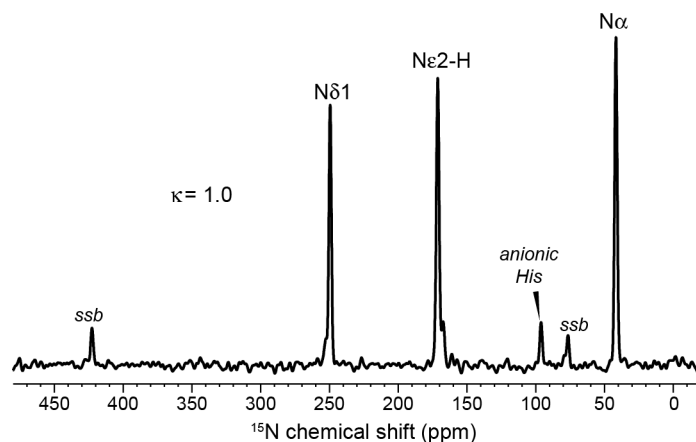

**Figure S2.** Representative  $^{15}\text{N}$  MAS spectrum of  $\text{U-}^{13}\text{C}$ ,  $^{15}\text{N}$ -labeled histidine at pH 8.5. The  $^1\text{H}$ - $^{15}\text{N}$  CP contact time was 3 ms and the rf field strengths were 40 kHz for both  $^1\text{H}$  and  $^{15}\text{N}$ , with a moderate rf field ramp of 90-100% on the  $^{15}\text{N}$  channel. The spectrum was measured at 293 K on a 400 MHz spectrometer under 7 kHz MAS. The unprotonated  $\text{N}\delta 1$  has a large CSA, giving rise to two sidebands (*ssb*). With these sideband intensities included, the integrated  $\text{N}\delta 1$  intensity is approximately the same as the  $\text{N}\epsilon 2\text{-H}$  peak intensity. The CP scaling factor,  $\kappa = I_{\text{NH}}/I_{\text{N}}$ , is 1.0 for this spectrum. The 98-ppm peak results from  $\text{N}\alpha$  of anionic His, which coexists with the zwitterionic form at this pH.

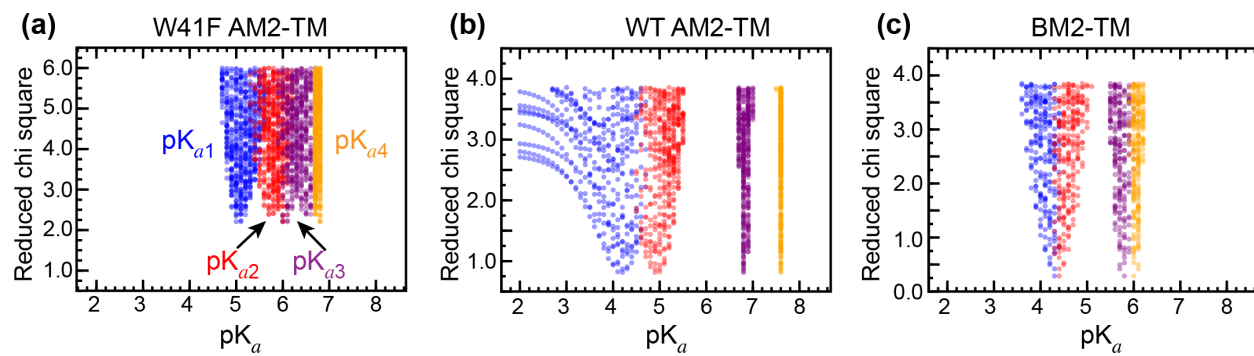

**Figure S3.** Statistical analysis of the distributions of the four H37  $pK_a$ 's in (a) W41F AM2-TM, (b) WT AM2-TM, and (c) BM2-TM. The reduced chi-square values are calculated assuming 1 degree of freedom as described in the Experimental section.

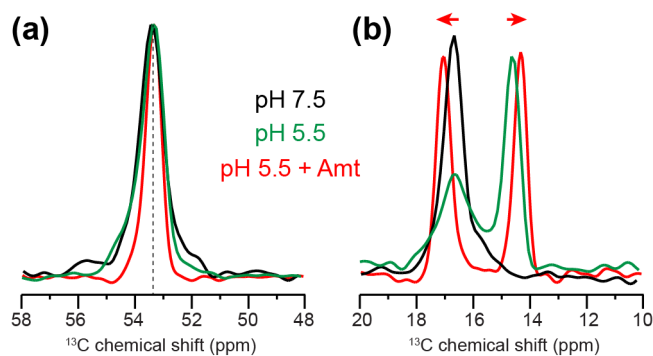

**Figure S4.** A30 cross sections extracted from 2D  $^{13}\text{C}$ - $^{13}\text{C}$  DARR spectra of W41F AM2-TM at pH 7.5 (black), pH 5.5 (green) and pH 5.5 with bound Amt (red). (a) The  $\text{C}\alpha$  cross section at 53.4 ppm, showing the same chemical shift for three samples. (b)  $\text{C}\beta$  cross sections. The  $\text{C}\beta$  peak at 16.7 ppm in the pH 7.5 and pH 5.5 samples moves downfield in the drug-bound sample, while the  $\text{C}\beta$  peak at 14.7 ppm in the pH 5.5 sample moves upfield in the drug-bound sample. Drug binding also narrows the linewidths. These observations indicate that all W41F AM2-TM channels contain bound drug.

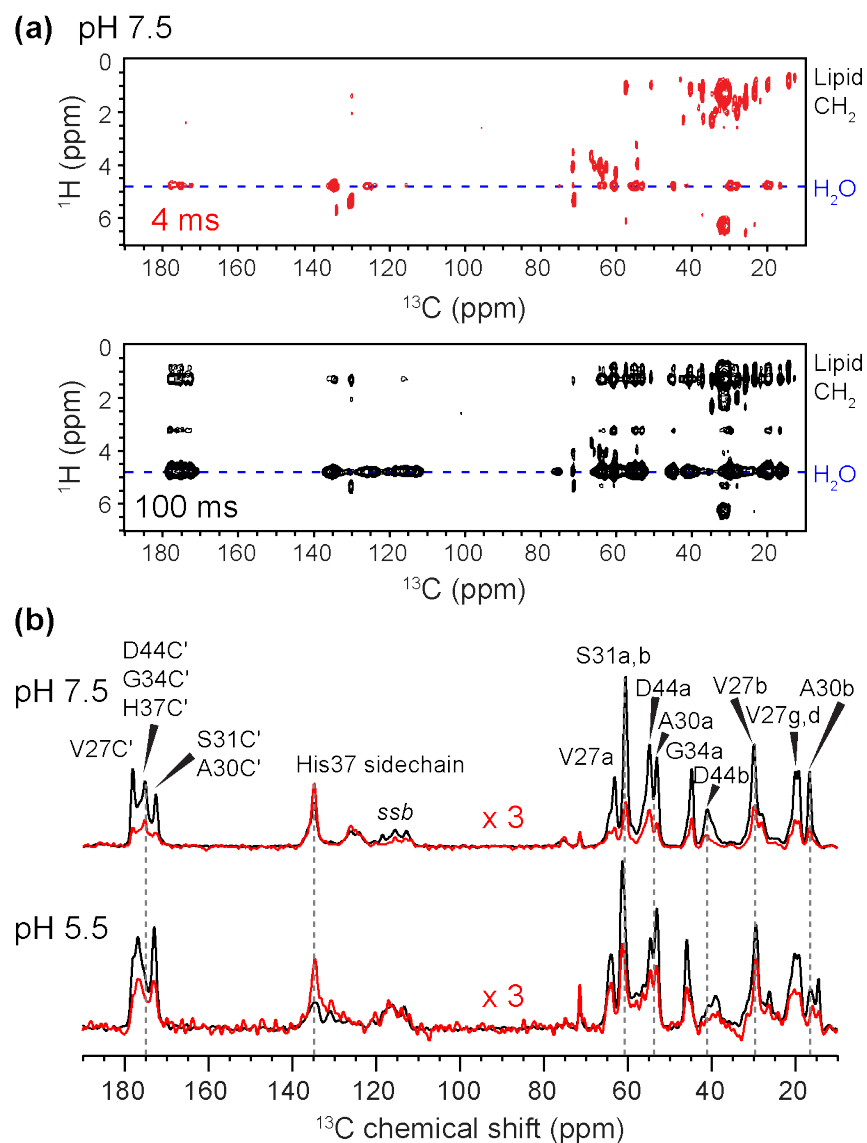

**Figure S5.** (a) 2D  $^1\text{H}$ - $^{13}\text{C}$  correlation spectra without  $^1\text{H}$  homonuclear decoupling of W41F AM2-TM at pH 7.5. Spin diffusion mixing times were 4 ms for the S spectrum and 100 ms for the  $S_0$  spectrum. The lack of  $^1\text{H}$ - $^1\text{H}$  homonuclear decoupling ensures that only the  $^1\text{H}$  signals of mobile water and lipid are detected. (b) Water  $^1\text{H}$  cross sections of the pH 7.5 and pH 5.5 samples at 4 ms (red) and 100 ms (black) mixing. The pH 5.5 sample shows higher intensities of the 4 ms spectrum relative to the pH 7.5 sample, indicating that the channel is better hydrated at low pH. The spectra were measured on an 800 MHz spectrometer at 293 K under 12 kHz MAS.

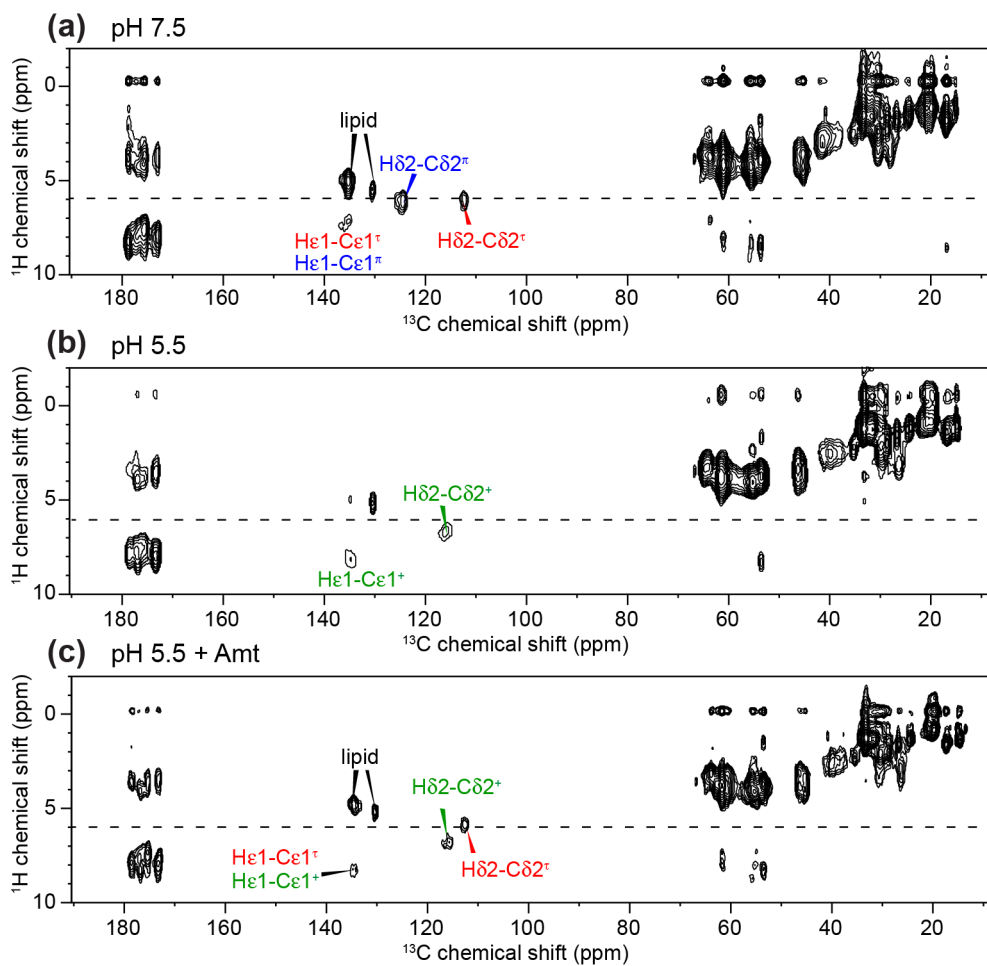

**Figure S6.** 2D  $^1\text{H}$ - $^{13}\text{C}$  correlation spectra with  $^1\text{H}$  homonuclear decoupling of W41F AM2-TM. (a) pH 7.5; (b) pH 5.5; (c) pH 5.5 with bound Amt. His37 assignments are shown in red, blue and green for the  $\tau$  tautomer,  $\pi$  tautomer, and cationic states, respectively. The spectra were measured at 263 K on an 800 MHz spectrometer. The  $^1\text{H}$ - $^{13}\text{C}$  LG-CP contact time was 300  $\mu\text{s}$  and FSLG decoupling was applied during  $t_1$ .

**Table S1.**  $^{13}\text{C}$  and  $^{15}\text{N}$  chemical shifts (in ppm) of imidazole atoms of H37 in W41F AM2-TM. Asterisks denote peaks with partial overlap and thus larger chemical shift uncertainty.

| H37 state       | C $\alpha$ | C $\beta$ | C $\gamma$ | C $\delta$ 2 | C $\epsilon$ 1 | N $\epsilon$ 2 | N $\delta$ 1 |
|-----------------|------------|-----------|------------|--------------|----------------|----------------|--------------|
| neutral, $\tau$ | 55.8       | 30.7      | 136.1      | 112.1        | 135*           | 161            | 252*         |
| neutral, $\pi$  | 55.8       | 27.8      | 126.0      | 124.2        | 135*           | 252*           | 170          |
| cat1            | 59         | 29        | 128        | 114          | 135*           | 169*           | 169*         |
| cat2            | 58         | 26        | 127        | 117          | 135*           | 175*           | 175*         |
| cat3            | 56.5       | 25.9      | 131.1      | 115.7        | 134.1          | 176            | 181*         |
| cat4            | 58.0       | 25.9      | 131.5      | 117.2        | 135*           | 175            | 181*         |

**Table S2.** Intensity ratios of H37 imidazole nitrogens in W41F AM2-TM. The scaling factor  $\kappa$  was measured before the experiment for each sample. The uncertainty in the scaling factor  $\kappa$  is estimated to be 0.05.

| Sample pH | $I_{\text{NH}}/I_{\text{N}}$ | $\kappa$ | [His]/[HisH $^+$ ] |
|-----------|------------------------------|----------|--------------------|
| 7.5       | 1.31 $\pm$ 0.03              | 1.2      | 22.3 $\pm$ 2.5     |
| 6.2       | 2.34 $\pm$ 0.16              | 1.3      | 2.49 $\pm$ 0.88    |
| 5.9       | 4.42 $\pm$ 0.18              | 1.2      | 0.70 $\pm$ 0.14    |
| 5.5       | 6.83 $\pm$ 0.47              | 1.2      | 0.43 $\pm$ 0.14    |
| 4.5       | 34.0 $\pm$ 4.7               | 1.0      | 0.06 $\pm$ 0.03    |

**Table S3.** Pearson product-moment correlation coefficient matrices for W41F AM2, WT AM2 and BM2.

|                  | W41F AM2-TM      |                  |                  |                  | WT AM2-TM        |                  |                  |                  | BM2-TM           |                  |                  |                  |
|------------------|------------------|------------------|------------------|------------------|------------------|------------------|------------------|------------------|------------------|------------------|------------------|------------------|
|                  | pK <sub>a1</sub> | pK <sub>a2</sub> | pK <sub>a3</sub> | pK <sub>a4</sub> | pK <sub>a1</sub> | pK <sub>a2</sub> | pK <sub>a3</sub> | pK <sub>a4</sub> | pK <sub>a1</sub> | pK <sub>a2</sub> | pK <sub>a3</sub> | pK <sub>a4</sub> |
| pK <sub>a1</sub> | 1.00             | -0.36            | -0.17            | 0.10             | 1.00             | -0.59            | 0.03             | -0.06            | 1.00             | -0.76            | 0.35             | -0.09            |
| pK <sub>a2</sub> | -0.36            | 1.00             | -0.36            | 0.07             | -0.59            | 1.00             | -0.22            | 0.07             | -0.76            | 1.00             | -0.51            | 0.18             |
| pK <sub>a3</sub> | -0.17            | -0.36            | 1.00             | -0.41            | -0.03            | -0.22            | 1.00             | -0.06            | 0.35             | -0.51            | 1.00             | -0.63            |
| pK <sub>a4</sub> | 0.10             | 0.07             | -0.41            | 1.00             | -0.06            | 0.07             | -0.06            | 1.00             | -0.09            | 0.18             | -0.63            | 1.00             |

**Table S4.** Approximate proton dissociation equilibrium constants  $K_a$  for WT and W41F M2 channels under different pH and drug binding conditions.

| M2        | High pH                              | Low pH                                           | Low pH with drug                                               |
|-----------|--------------------------------------|--------------------------------------------------|----------------------------------------------------------------|
| Wild type | $k'_{off}/k_{on}$                    | $(k'_{off} + k_{off})/k_{on}$                    | $k_{off}/\epsilon$                                             |
| W41F      | $(k'_{off} + k_{off}^{W41F})/k_{on}$ | $(k'_{off} + k_{off}^{W41F})/(k_{on} + k'_{on})$ | $K_a^{W41F, drug} \approx k_{off}^{W41F}/(k'_{on} + \epsilon)$ |
